# Supplementary material for: Ionic conductivity promotion of polymer electrolyte with ionic liquid grafted oxides for all-solid-state lithium–sulfur batteries
Source: Royal Society of Chemistry journal article supplement (doi:10.1039/c7ta03699j), 2017-01-01
Supplement: c7ta03699j1.pdf [file c7ta03699j1.pdf]

Electronic supplementary information

Ionic Conductivity Promotion of Polymer Electrolyte with Ionic Liquid Grafted Oxides for All-Solid-State Lithium-Sulfur Batteries

Ouwei Sheng,<sup>‡a</sup> Chengbin Jin,<sup>‡a</sup> Jianmin Luo,<sup>a</sup> Huadong Yuan,<sup>a</sup> Cong Fang,<sup>a</sup> Hui Huang,<sup>a</sup> Yongping Gan,<sup>a</sup> Jun Zhang,<sup>a</sup> Yang Xia,<sup>a</sup> Chu Liang,<sup>a</sup> Wenkui Zhang,<sup>a</sup> and Xinyong Tao<sup>a,\*</sup>

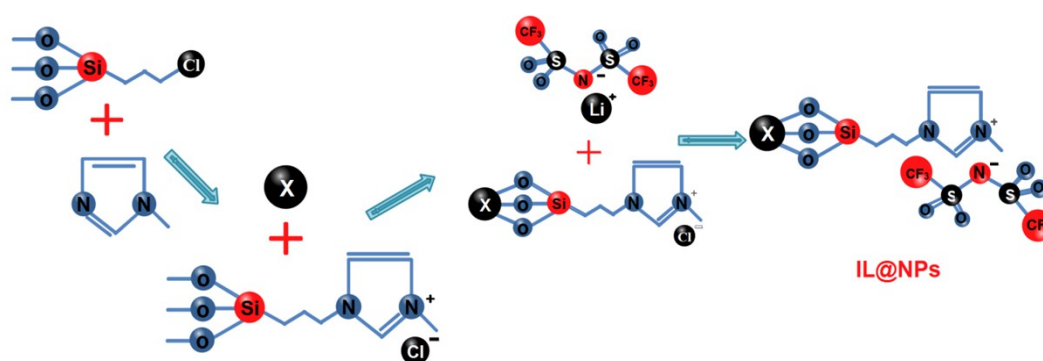

Fig. S1 Schematic illustration of the fabrication process of IL@NPs based on ion exchange method.

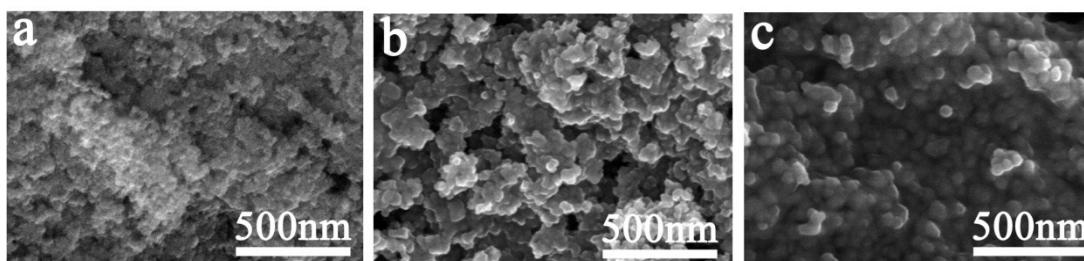

Fig. S2 SEM morphology of (a) IL@SiO<sub>2</sub>, (b) IL@TiO<sub>2</sub>, (c) IL@ZrO<sub>2</sub>.

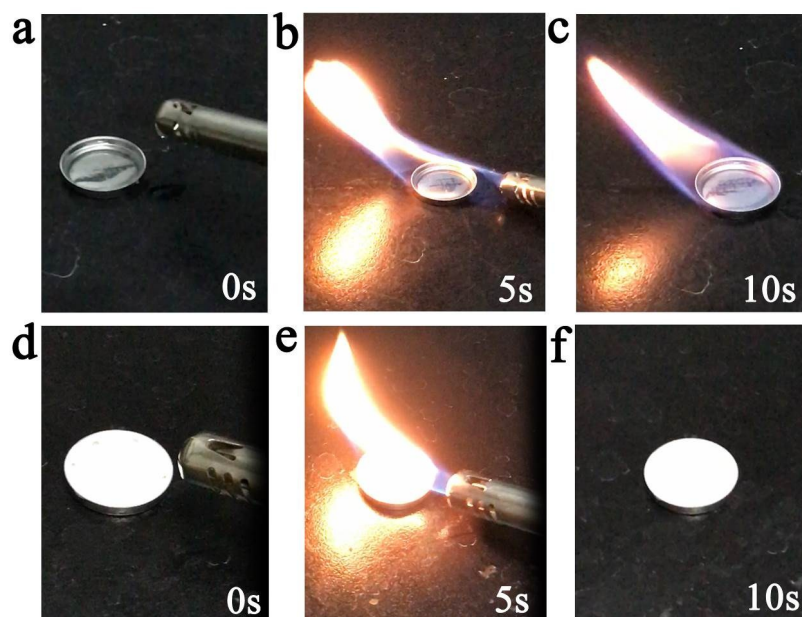

**Fig. S3** Flammability tests of (a-c) 1 M LiTFSI and 0.1 M LiNO<sub>3</sub> dissolved in a mixture of 1,3-dioxolane (DOL) and dimethoxymethane (DME) (v/v=1:1) and (d-f) PEO-Li-Zr electrolytes using a burning torch.

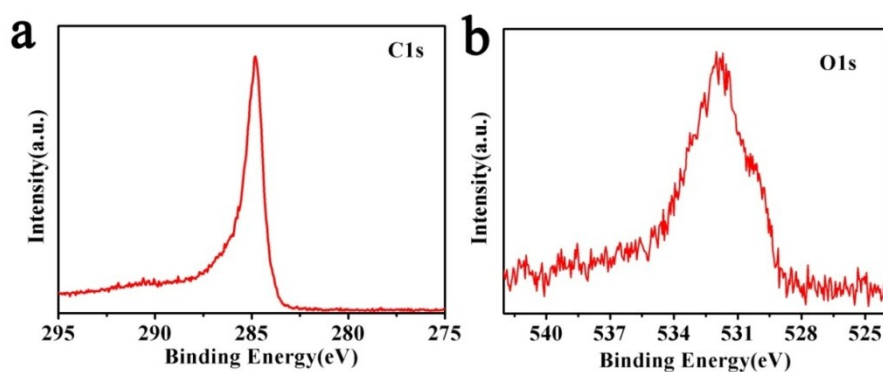

**Fig. S4** XPS of (a) C1s and (b) O1s respectively.

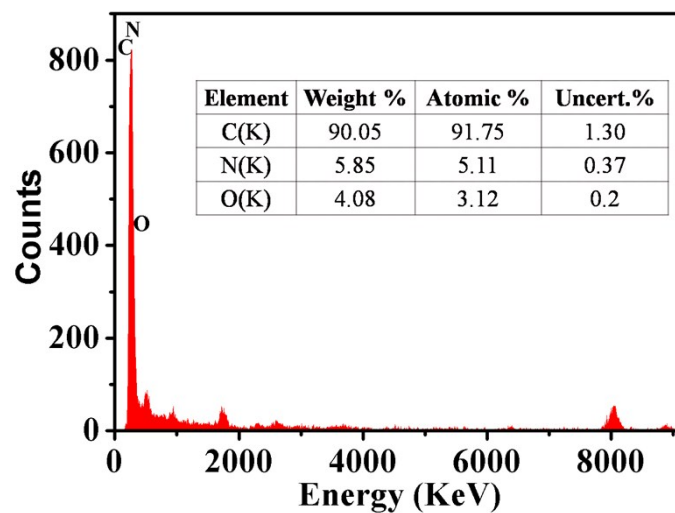

**Fig. S5** EDX full elements analysis of N-CNs.

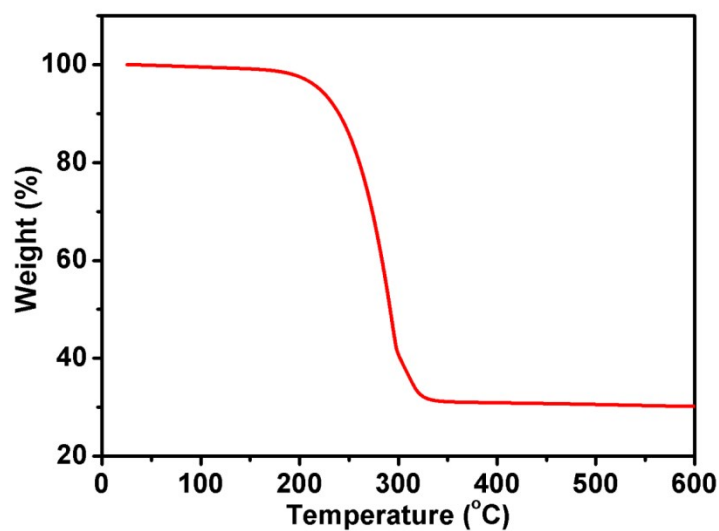

Fig. S6 TG curves of N-CNs/S materials.

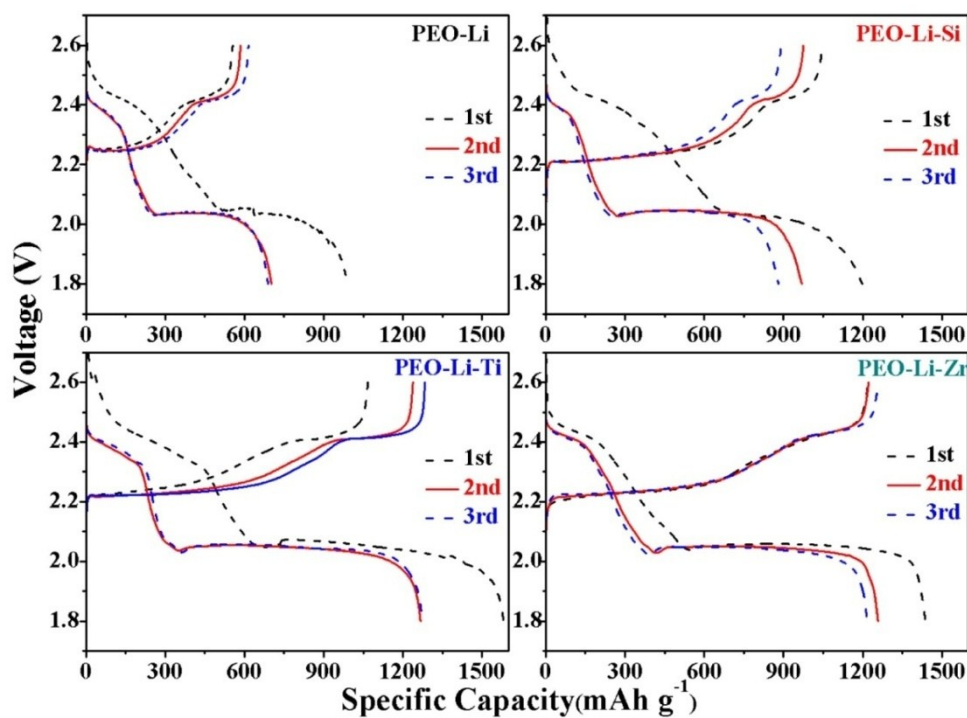

Fig. S7 The discharge/charge curves of the first three cycles for the battery based on PEO-Li, PEO-Li-Si, PEO-Li-Ti, PEO-Li-Zr electrolytes at 50 °C.

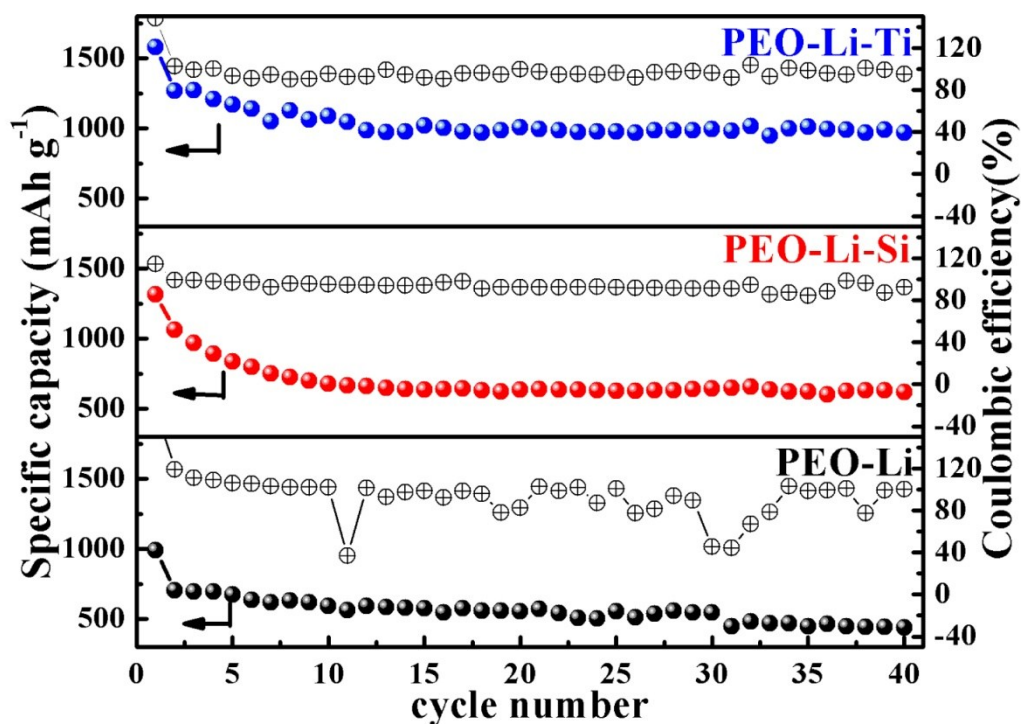

Fig.S8 Discharge capacity and Coulombic efficiencies of PEO-Li, PEO-Li-Si, PEO-Li-Ti battery at 50 °C.

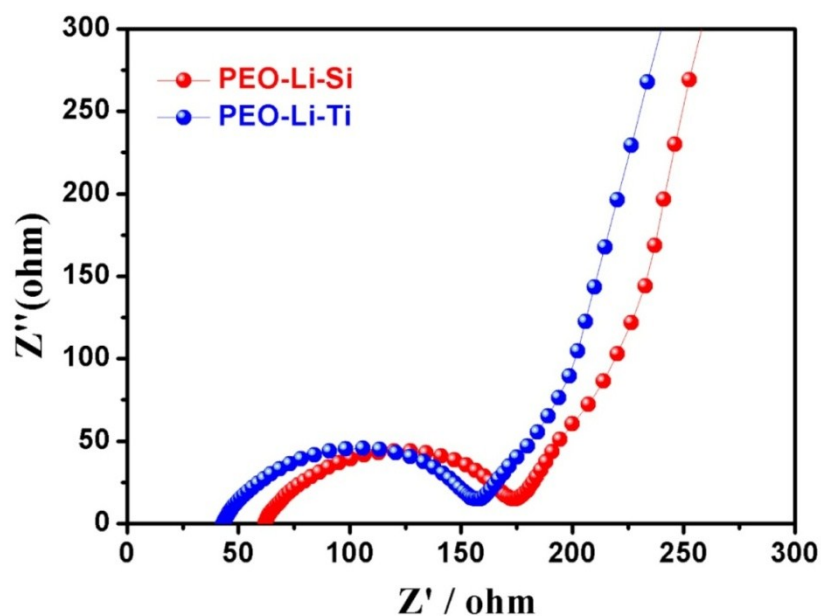

Fig. S9 Electrochemical impedance spectroscopy (EIS) of PEO-Li-Si, PEO-Li-Ti battery at 50 °C.

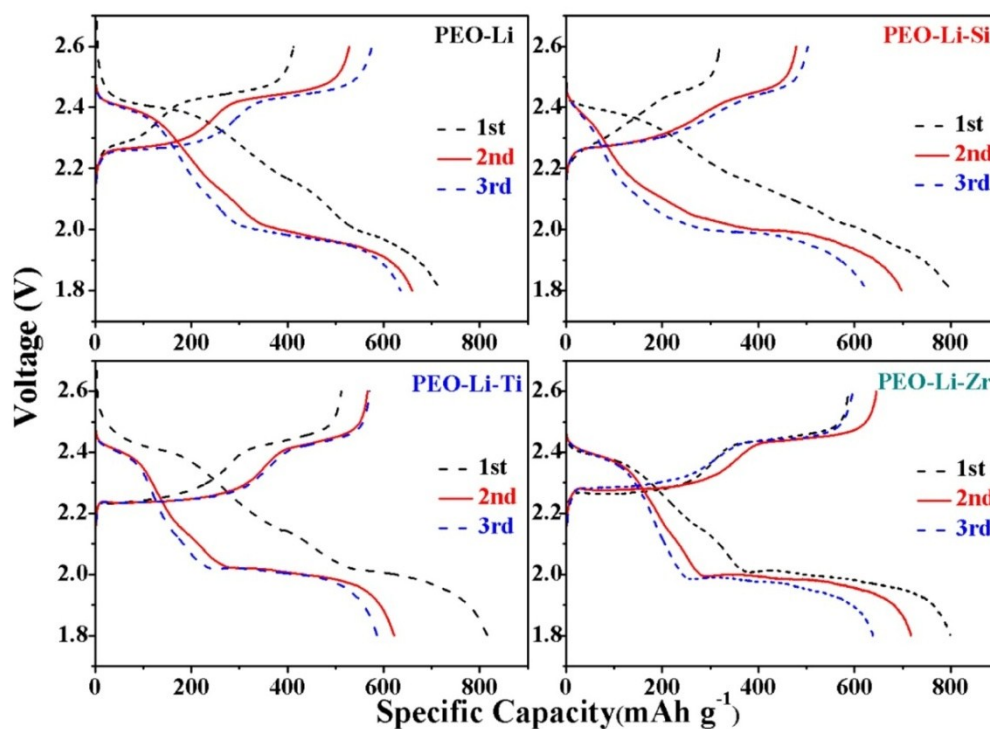

**Fig. S10** The discharge/charge curves of the first three cycles for the battery based on PEO-Li, PEO-Li-Si, PEO-Li-Ti, PEO-Li-Zr electrolytes at 37 °C.

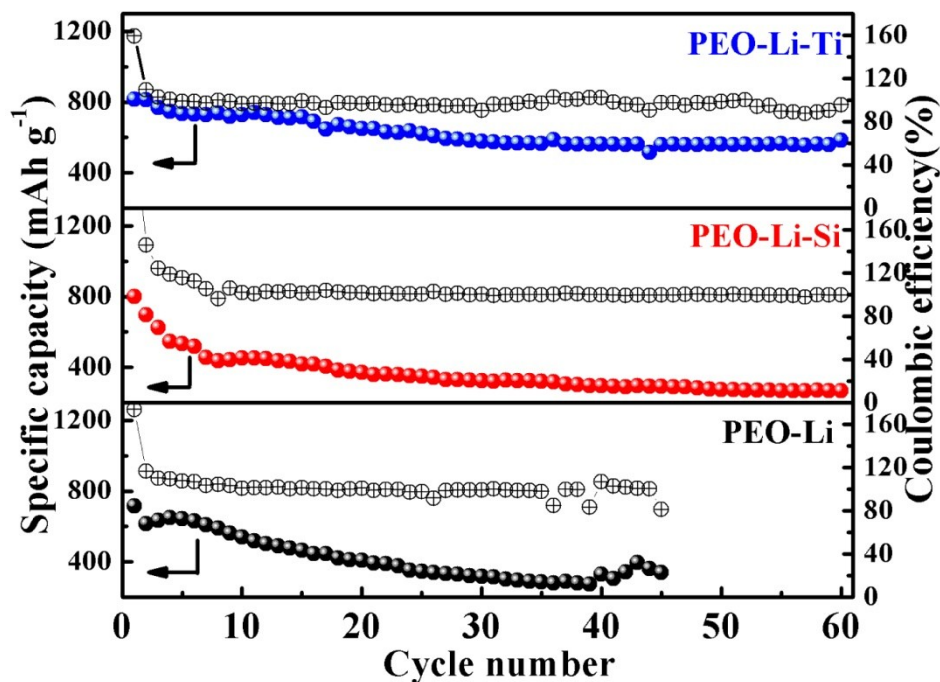

**Fig. S11** Discharge capacity and Coulombic efficiencies of PEO-Li, PEO-Li-Si, PEO-Li-Ti battery at 37 °C.

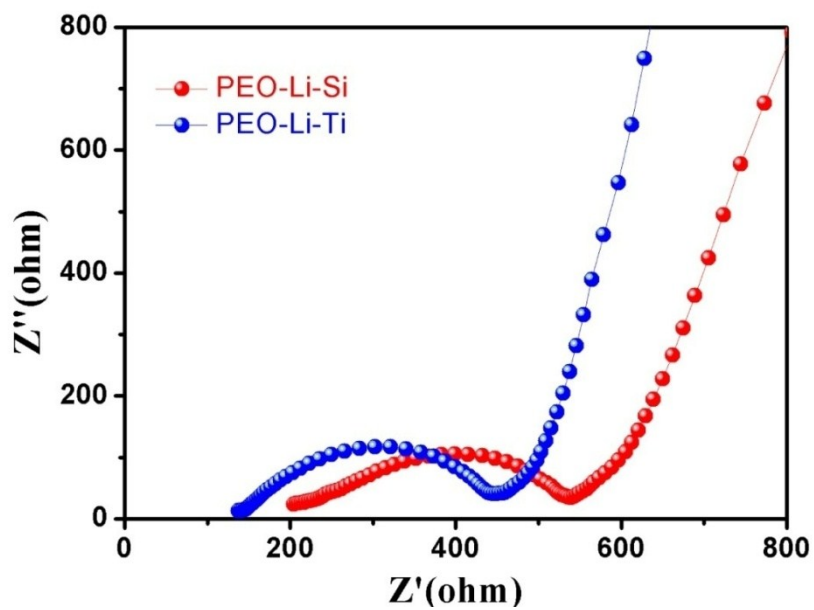

**Fig. S12** Electrochemical impedance spectroscopy (EIS) of PEO-Li-Si, PEO-Li-Ti battery at 37 °C.

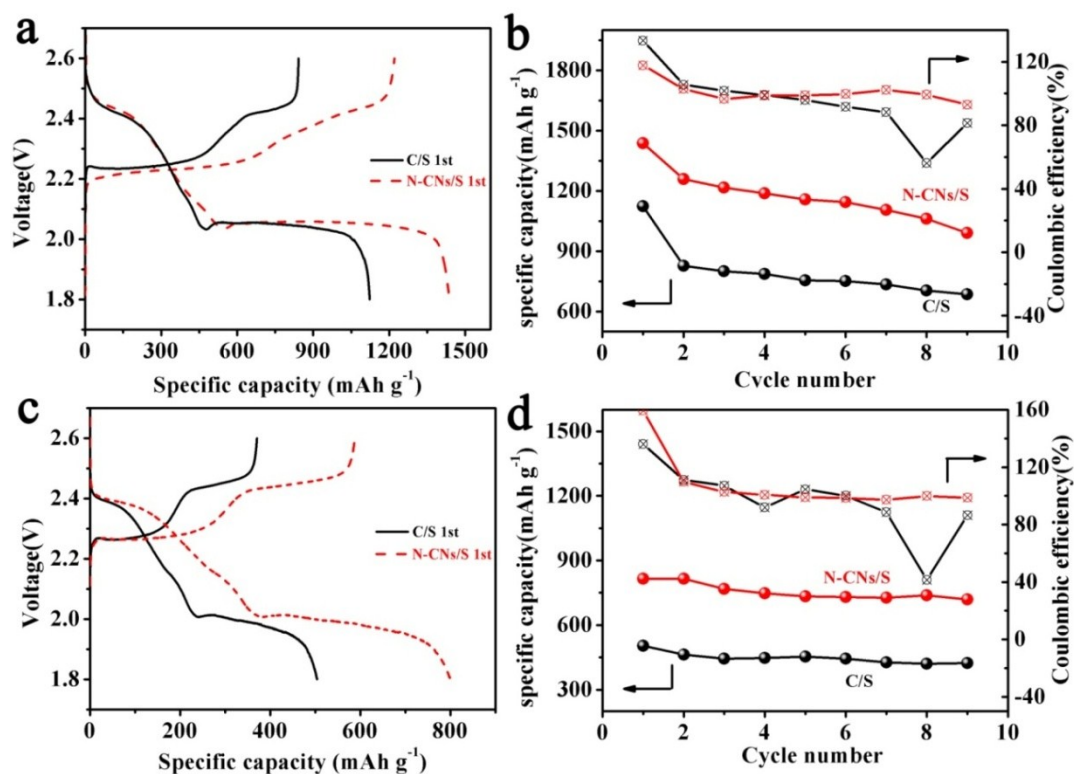

**Fig. S13** Typical discharge/charge curves of Carbon black/S cathode and N-CNs/S cathode using PEO-Li-Zr electrolyte at 50 °C. b) Discharge/charge capacity and Coulombic efficiencies of the battery with Carbon black/S cathode or N-CNs/S cathode at 50 °C. c) Typical discharge/charge curves of Carbon black/S cathode and N-CNs/S cathode using PEO-Li-Zr electrolyte at 37 °C. d) Discharge/charge capacity and coulombic efficiencies of the battery with Carbon black/S cathode or N-CNs/S cathode at 37 °C.

**Table S1.** Comparison of the electrochemical performance of different all-solid-state batteries

| Electrolyte                                                                  | Cathode/<br>Anode       | Working<br>Voltage (V) | Working<br>Temp(°C) | Capacity (mAh g <sup>-1</sup> ) | Year        | Ref |
|------------------------------------------------------------------------------|-------------------------|------------------------|---------------------|---------------------------------|-------------|-----|
| PEO-LiTFSI<br>-Pyr <sub>14</sub> TFSI                                        | LiFePO <sub>4</sub> /Li | 3.0-4.0                | 40                  | 160 (After 100cycles)           | 2014        | [1] |
| PEO-LiTFSI<br>-HMOP                                                          | LiFePO <sub>4</sub> /Li | 2.9-3.8                | 65                  | 120 (After 100cycles)           | 2016        | [2] |
| PEO-LiClO <sub>4</sub><br>-SiO <sub>2</sub>                                  | LiFePO <sub>4</sub> /Li | 2.5-4.1                | 90                  | 105 (After 80cycles)            | 2016        | [3] |
| PEO-LiClO <sub>4</sub><br>-LLZTO                                             | LiFePO <sub>4</sub> /Li | 2.6-3.8                | 60                  | 105 (After 200cycles)           | 2016        | [4] |
| PEO-LiCF <sub>3</sub> SO <sub>3</sub><br>-Li <sub>2</sub> S-ZrO <sub>2</sub> | Li <sub>2</sub> S-C /Li | 1.5-3.2                | 70                  | 600 (After 50cycles)            | 2010        | [5] |
| PEO-LiTFSI<br>-MIL-53(Al)                                                    | PANI@C/S-<br>280/Li     | 1.0-3.0                | 80                  | 876 (After 60cycles)            | 2015        | [6] |
| PEO-LiTNSFI                                                                  | CMK-3/S /Li             | 1.5-3.0                | 60                  | 450 (After 200cycles)           | 2016        | [7] |
| <b>PEO-LiTFSI<br/>-IL@ZrO<sub>2</sub></b>                                    | <b>N-CNs/S/Li</b>       | <b>1.8-2.6</b>         | <b>37</b>           | <b>600 (After 80cycles)</b>     | <b>Our</b>  |     |
|                                                                              |                         |                        | <b>50</b>           | <b>986 (After 40cycles)</b>     | <b>work</b> |     |

## References

- 1 M. Wetjen, G. T. Kim, M. Joost, G. B. Appetecchi, M. Winter, S. Passerini, *J. Power Sources*, 2014, **246**, 846-857
- 2 W. Zhou, H. Gao, J. B. Goodenough, *Adv. Energy Mater.*, 2016, **6**, 1501802
- 3 D. Lin, W. Liu, Y. Liu, H. R. Lee, P. C. Hsu, K. Liu, Y. Cui, *Nano Lett.*, 2016, **16**, 459-465.
- 4 J. Zhang, N. Zhao, M. Zhang, Y. Li, P. K. Chu, X. Guo, Z. Di, X. Wang, H. Li, *Nano Energy*, 2016, **28**, 447-454.
- 5 J. Hassoun, B. Scrosat, *Adv. Mater.*, 2010, **22**, 5198-5201
- 6 C. Zhang, Y. Lin, J. Liu, *J. Mater. Chem. A*, 2015, **3**, 10760-10766.
- 7 Q. Ma, X. Qi, B. Tong, Y. Zheng, W. Feng, J. Nie, Y. Hu, H. Li, X. Huang, L. Chen, Z. Zhou, *ACS Appl. Mater. Interfaces*, 2016, **8**, 29705-29712.
